# Supplementary material for: FIB-4 and APRI as Predictive Factors for Short- and Long-Term Survival in Patients with Transjugular Intrahepatic Portosystemic Stent Shunts
Source: MDPI journal article supplement (doi:10.3390/biomedicines10051018), 2022-04-28
Supplement: s1 [file s1]

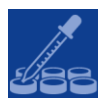**Table S1.** Baseline demographic and clinical characteristics of the validation co-hort.

|                                        | <b>All patients</b> |
|----------------------------------------|---------------------|
| Patients, n (%)                        | 187 (100)           |
| Age, y                                 | 59 (52-67)          |
| Male/female, n (%)                     | 115/72 (62/38)      |
| Etiology of cirrhosis                  |                     |
| Alcohol/viral/autoimmune/NASH/other, n | 112/16/2/18/49      |
| Child Pugh A/B/C, n                    | 6/163/18            |
| MELD                                   | 13 (10-16)          |
| Previous SPB yes/no, n (%)             | 77/110 (41/59)      |
| HE, n (%)                              | 8 (4)               |
| TIPS procedural characteristics        |                     |
| Pre-TIPS PSG, mmHg                     | 15 (12-18)          |
| Post-TIPS PSG, mmHg                    | 5 (4-7)             |
| Reduction PSG, mmHg                    | 10 (7-13)           |
| Stent diameter, mm                     | 8 (8-8)             |
| Laboratory characteristics             |                     |
| Leukocytes, /nl                        | 5.9 (4.4-8.5)       |
| Hemoglobin, g/dl                       | 10 (8.8-11.7)       |
| Platelets, /nl                         | 126 (87-181)        |
| INR                                    | 1.25 (1.15-1.41)    |
| Sodium, mmol/l                         | 135 (131-138)       |
| Creatinine, mg/dl                      | 1.3 (0.9-1.7)       |
| Bilirubin, mg/dl                       | 1.0 (0.6-1.5)       |
| AST, U/l                               | 42 (32-55)          |
| ALT, U/l                               | 23 (15-34)          |
| Albumin, g/dl                          | 2.8 (2.4-3.2)       |
| CRP, mg/dl                             | 1.1 (0.5-2.0)       |

**Abbreviations:** NASH: non-alcoholic steatohepatitis; MELD: model of end-stage liver disease; SPB: Spontaneous bacterial peritonitis; HE: hepatic encephalopathy, TIPS: transjugular portosystemic shunt insertion; PSG: portosystemic pressure gradient; INR: international normalized ratio; AST: aspartate aminotransferase; ALT: alanine aminotransferase; CRP: C-reactive protein; Shown is median with IQR or numbers with percentages.

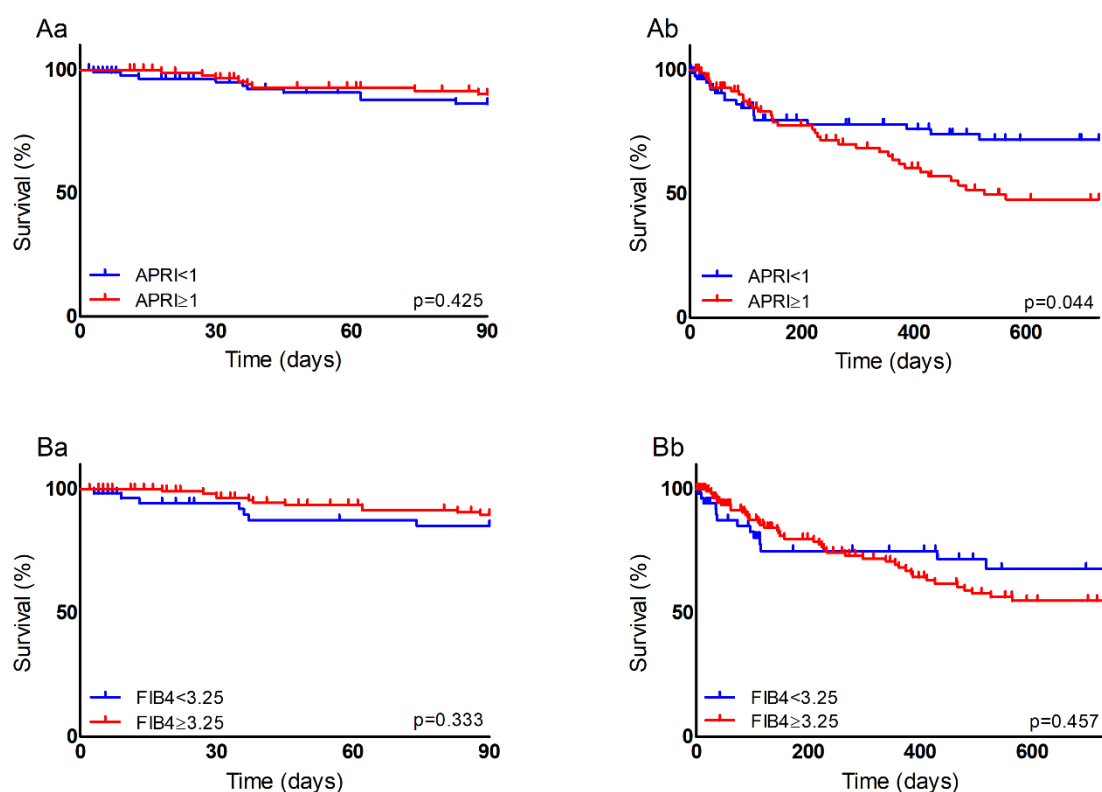

**Figure S1.** 90-days (a) and 730 days (b) LTF survival of TIPS patients in the validation cohort in dependence of A) APRI (<1 vs. ≥1) and B) FIB-4 (<3.25 vs. ≥3.25), p-values were obtained using the log-rank test.

**Table S2.** Multivariate Cox-regression analyzing risk factors for liver-related event incidence after TIPS insertion. All significant parameters tested in the univariate analysis were included in the multivariate model.

| Risk factor for event | Multivariate analysis 24 months |      |      |
|-----------------------|---------------------------------|------|------|
|                       | HR                              | SE   | p    |
| MELD                  | 1.140                           | .051 | .010 |
| FIB-4                 | 1.267                           | .081 | .003 |

**Abbreviations:** MELD: model of end-stage liver disease; FIB-4: Fibrosis-4 score; HR: hazard ratio; SE: standard error.
